# Supplementary material for: A robust prognostic gene expression signature for early stage lung adenocarcinoma
Source: PubMed Central journal article supplement (PMC4761211; doi:10.1186/s40364-016-0058-3), 2016-02-19

**Supplementary Figure 1A**  
TCGA LUAD RNAseq – stage I and II  
ESLA-7, DFS

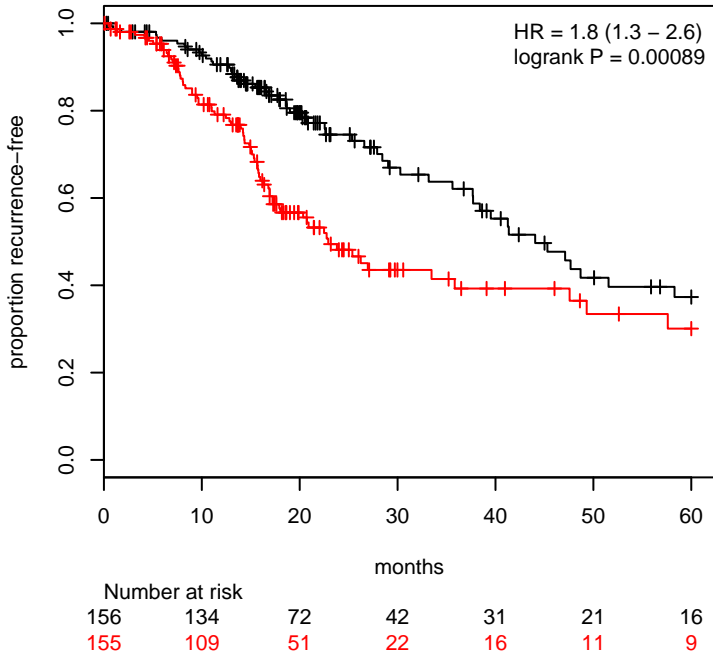

**Supplementary Figure 1B**  
TCGA LUAD RNAseq – stage I and II  
ESLA-7, DFS – no treatment

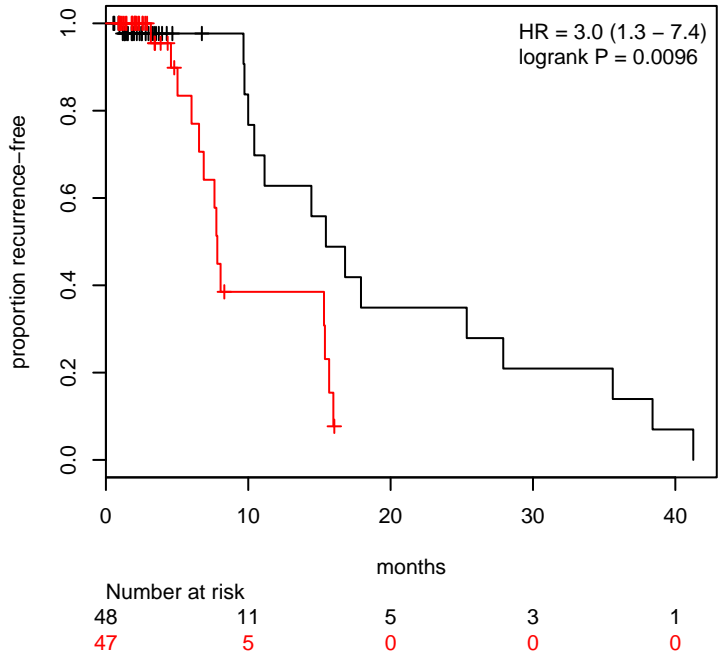

**Supplementary Figure 1C**  
TCGA LUAD RNAseq – stage I and II  
CIN25, DFS

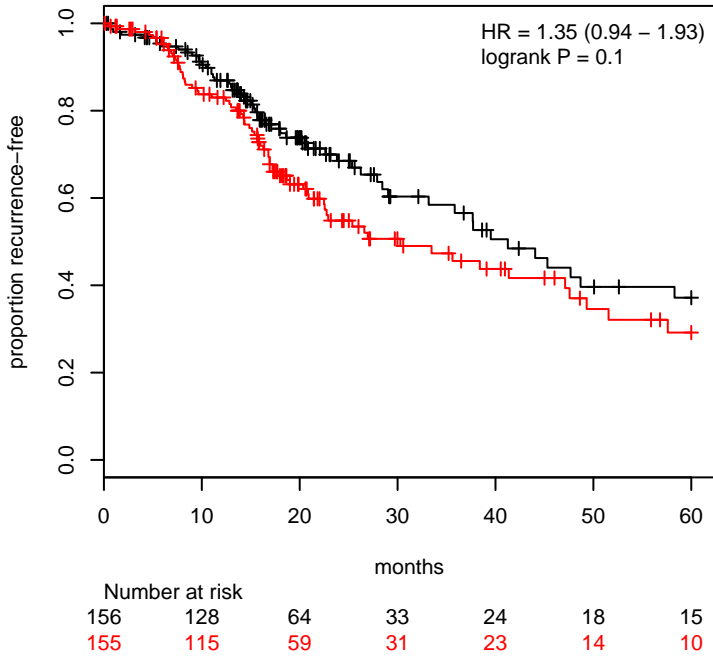

**Supplementary Figure 1D**  
TCGA LUAD RNAseq – stage I and II  
CIN25, DFS – no treatment

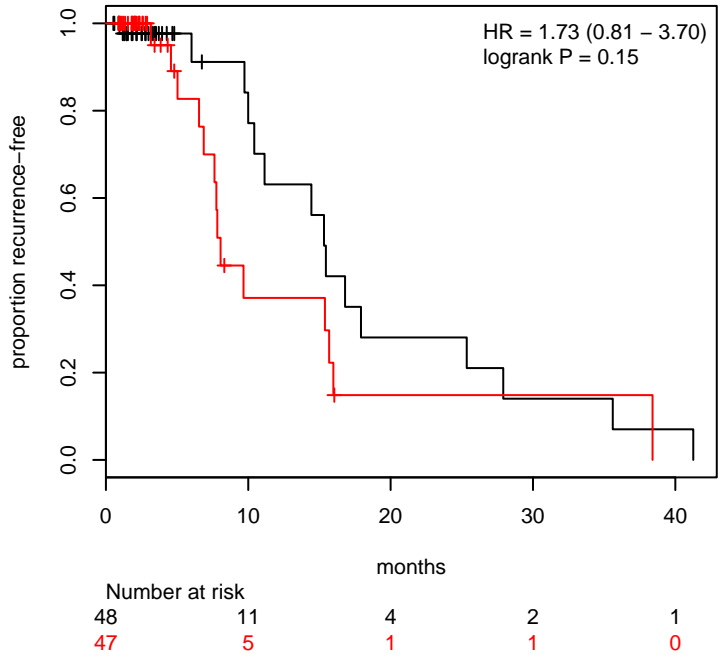

**Supplementary Figure 1E**  
TCGA LUAD RNAseq – stage I and II  
CCP, DFS

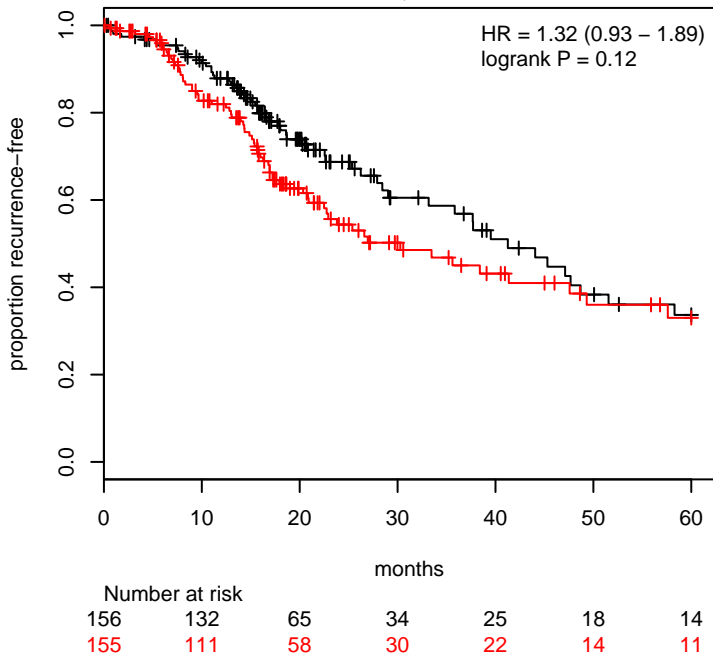

**Supplementary Figure 1F**  
TCGA LUAD RNAseq – stage I and II  
CCP, DFS – no treatment

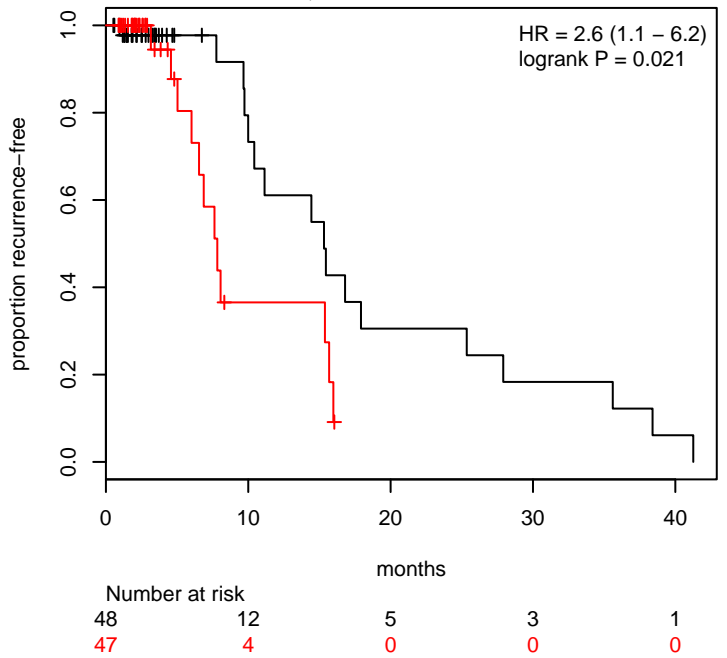

Supplement: 40364_2016_58_MOESM1_ESM.pdf [file 40364_2016_58_MOESM1_ESM.pdf]
