# Supplementary material for: A robust prognostic gene expression signature for early stage lung adenocarcinoma
Source: PubMed Central journal article supplement (PMC4761211; doi:10.1186/s40364-016-0058-3), 2016-02-19

# GSE8894 NSCLC Adeno untreated

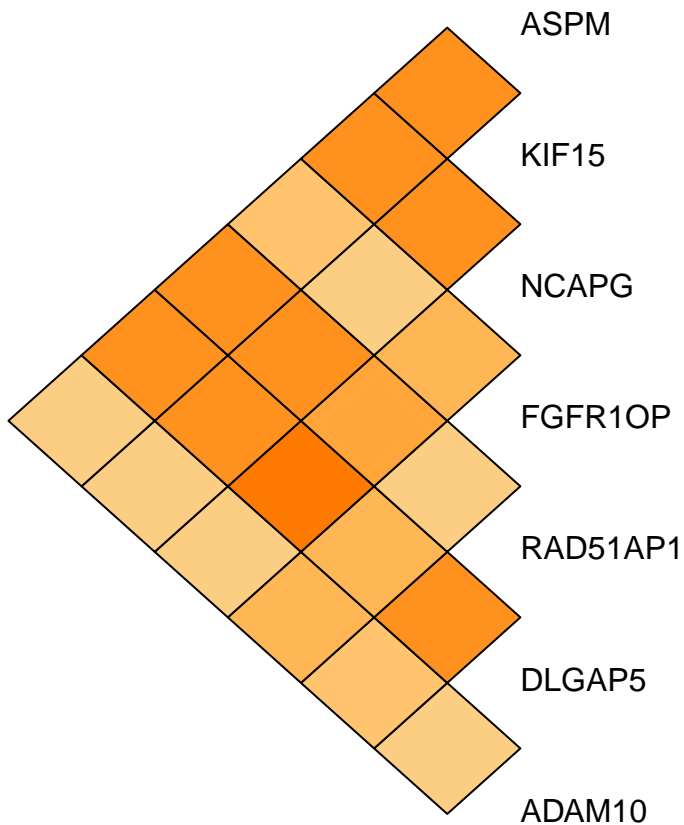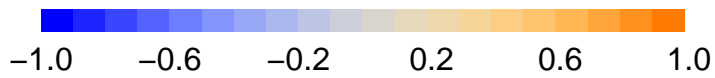

# GSE14814 NSCLC Adeno untreated

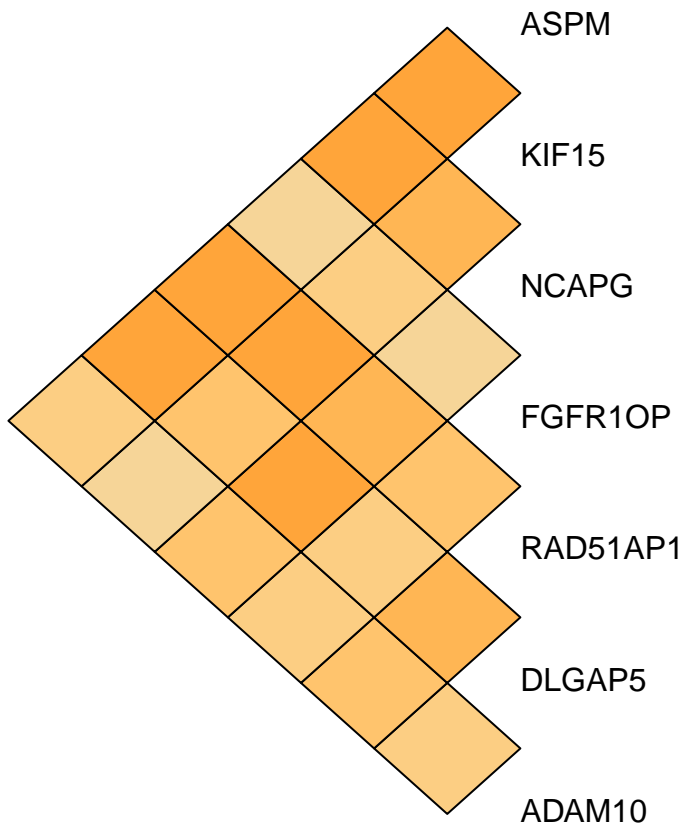

# NCI\_lung Adeno untreated

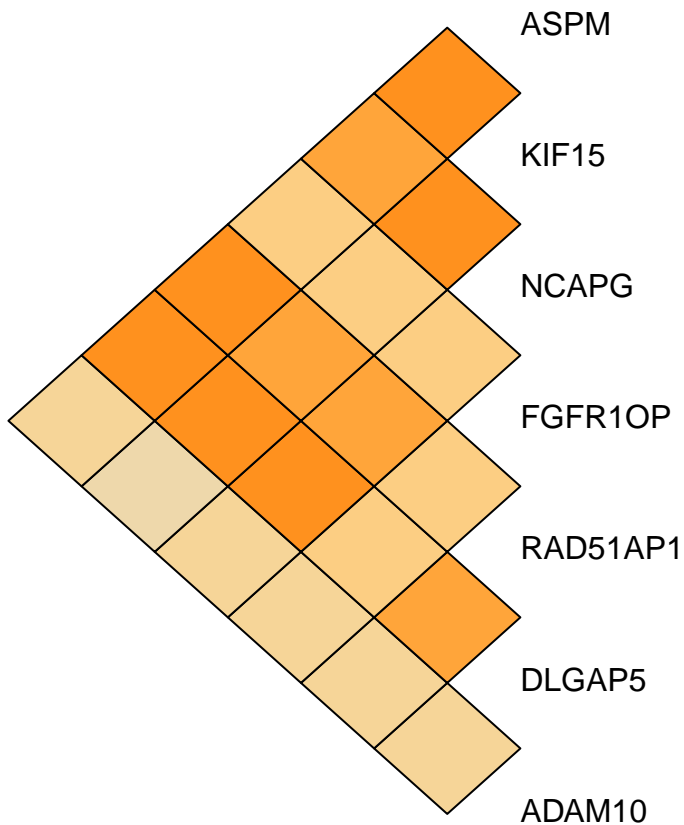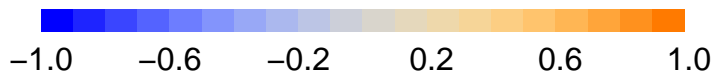

# GSE30219 Adeno untreated

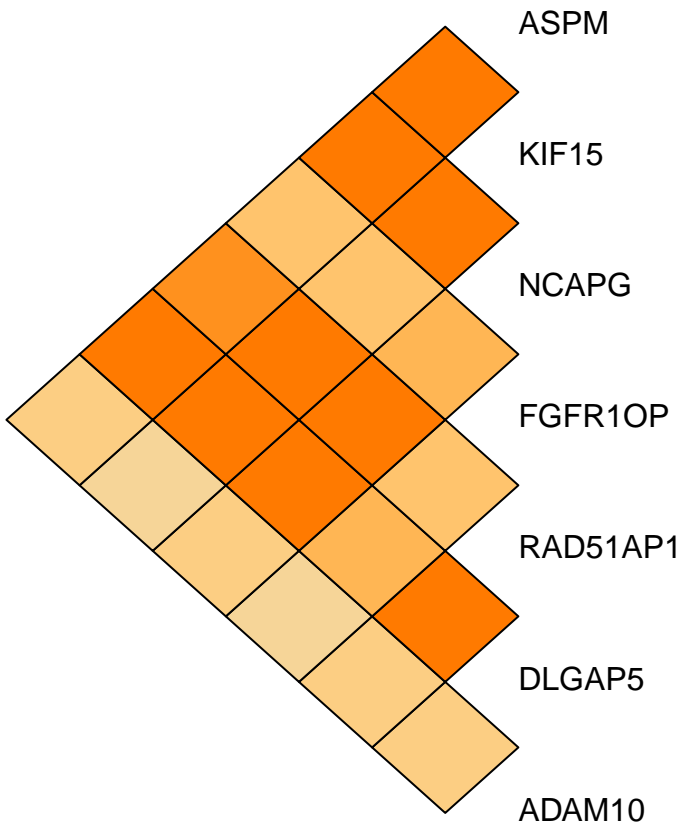

# GSE31210 Adeno untreated

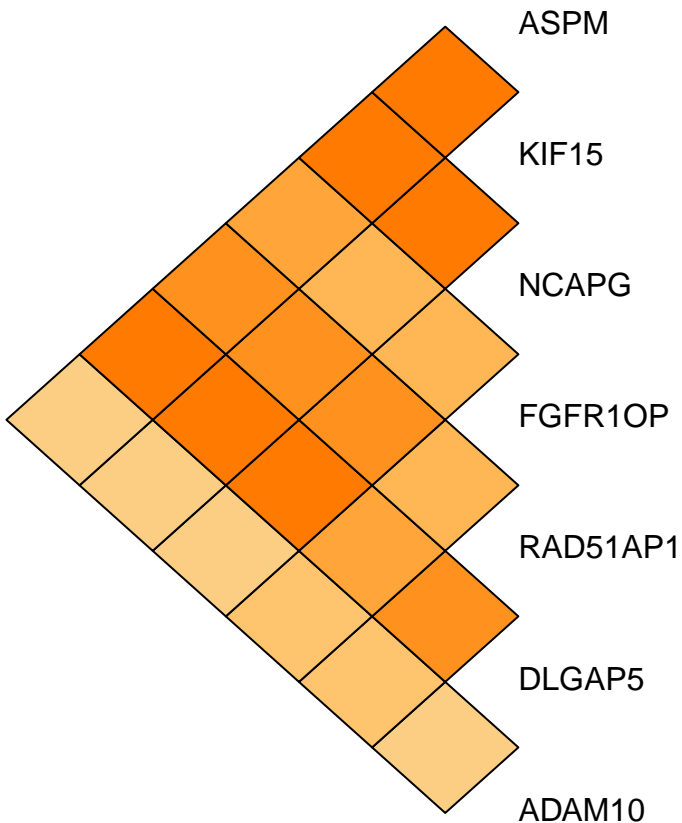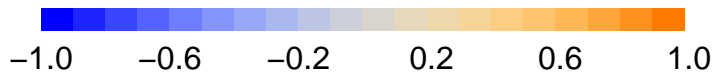

# GSE37745 Adeno untreated

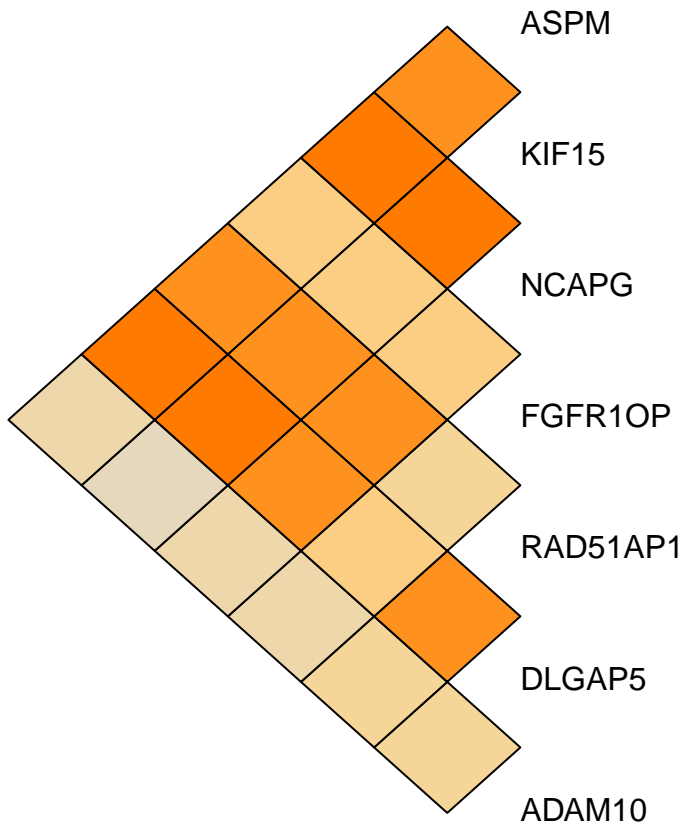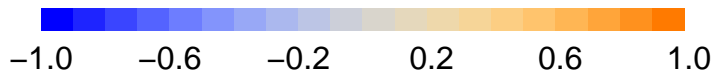

# GSE50081 Adeno untreated

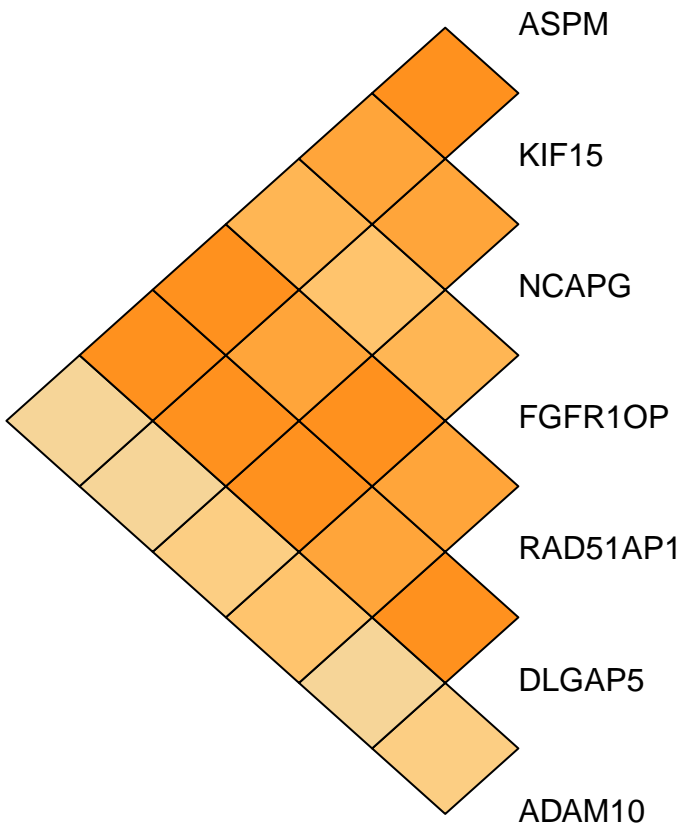

Supplement: 40364_2016_58_MOESM4_ESM.pdf [file 40364_2016_58_MOESM4_ESM.pdf]
